# Supplementary material for: A phase 1 trial of SGN-CD70A in patients with CD70-positive diffuse large B cell lymphoma and mantle cell lymphoma
Source: PubMed Central journal article supplement (PMC6440937; doi:10.1007/s10637-018-0655-0), 2018-08-22
Supplement: 10637_2018_655_MOESM1_ESM.pdf [file 10637_2018_655_MOESM1_ESM.pdf]

**Article Title:** A phase 1 trial of SGN-CD70A in patients with CD70-positive Diffuse Large B Cell Lymphoma and Mantle Cell Lymphoma

**Journal Name:** Investigational New Drugs

**Author Names:** Tycel Phillips, Paul M. Barr, Steven I. Park, Kathryn Kolibaba, Paolo F. Caimi, Saurabh Chhabra, Edwin C. Kingsley, Thomas Boyd, Robert Chen, Anne-Sophie Carret, Elaina M. Gartner, Hong Li, Cindy Yu, David C. Smith

**Correspondence:** Tycel Phillips, MD  
 1500 E. Medical Center Dr. SPC 5911, Ann Arbor, MI 48109  
 Phone: (734) 647-8901  
 Fax: (734) 232-1328  
 Email: [tycelp@med.umich.edu](mailto:tycelp@med.umich.edu)

**Online Resource 1:** First-dose pharmacokinetic parameters for SGN-CD70A ADC and TAB – q3wk and q6wk dosing schedule

|                                | q3wk                  |                       |                       |                      | q6wk                  |                       |
|--------------------------------|-----------------------|-----------------------|-----------------------|----------------------|-----------------------|-----------------------|
|                                | 8 mcg/kg<br>(N=3)     | 15 mcg/kg<br>(N=3)    | 30 mcg/kg<br>(N=5)    | 50 mcg/kg<br>(N=1)   | 30 mcg/kg<br>(N=6)    | 50 mcg/kg<br>(N=2)    |
| <b>SGN-CD70A ADC</b>           |                       |                       |                       |                      |                       |                       |
| AUC <sub>tau</sub> (ng*day/mL) | 406.18 (37)<br>[n=2]  | 924.57 (54)<br>[n=3]  | 1749.24 (30)<br>[n=5] | 4393.18 (-)<br>[n=1] | 1571.38 (26)<br>[n=5] | 1587.61 (10)<br>[n=2] |
| AUC <sub>inf</sub> (ng*day/mL) | 414.02 (39)<br>[n=2]  | 956.55 (56)<br>[n=3]  | 1827.79 (33)<br>[n=5] | 4472.73 (-)<br>[n=1] | 1573.78 (26)<br>[n=5] | 1588.66 (10)<br>[n=2] |
| C <sub>coi</sub> (ng/mL)       | 136.50 (6)<br>[n=3]   | 360.07 (19)<br>[n=3]  | 711.17 (17)<br>[n=5]  | 1310.00 (-)<br>[n=1] | 737.81 (11)<br>[n=6]  | 860.49 (32)<br>[n=2]  |
| t <sub>1/2</sub> (days)        | 3.46 (33)<br>[n=2]    | 4.31 (28)<br>[n=3]    | 5.15 (28)<br>[n=5]    | 3.39 (-)<br>[n=1]    | 3.94 (33)<br>[n=5]    | 3.51 (10)<br>[n=2]    |
| V <sub>ss</sub> (mL)           | 5594.22 (6)<br>[n=2]  | 6749.76 (8)<br>[n=3]  | 7669.83 (26)<br>[n=5] | 4577.79 (-)<br>[n=1] | 6472.24 (26)<br>[n=5] | 8777.73 (16)<br>[n=2] |
| CL (mL/day)                    | 1243.37 (44)<br>[n=2] | 1359.75 (31)<br>[n=3] | 1518.86 (40)<br>[n=5] | 1026.22 (-)<br>[n=1] | 1572.40 (38)<br>[n=5] | 2768.91 (29)<br>[n=2] |
| <b>SGN-CD70A TAB</b>           |                       |                       |                       |                      |                       |                       |
| AUC <sub>tau</sub> (ng*day/mL) | 491.01 (-)<br>[n=1]   | 1683.40 (3)<br>[n=2]  | 2168.40 (36)<br>[n=4] | 6233.84 (-)<br>[n=1] | 2185.78 (37)<br>[n=4] | 2094.54 (-)<br>[n=1]  |
| C <sub>coi</sub> (ng/mL)       | 139.07 (12)<br>[n=3]  | 376.88 (14)<br>[n=3]  | 714.39 (17)<br>[n=5]  | 861.00 (-)<br>[n=1]  | 771.76 (17)<br>[n=6]  | 782.19 (40)<br>[n=2]  |

ADC, antibody-drug conjugate; AUC<sub>inf</sub>, area under the concentration-time curve from 0 to infinity; AUC<sub>tau</sub>, area under the concentration-time curve from 0 to 21 days for q3wk and from 0 to 42 days for q6wk; C<sub>coi</sub>, concentration at end of infusion; CL, clearance; q3wk, dose every 3 weeks; q6wk, dose every 6 weeks, t<sub>1/2</sub>, terminal half-life, TAB, total antibody; V<sub>ss</sub>, volume of distribution at steady state

Data are presented as geometric mean (% coefficient of variation).
