# Supplementary material for: A phase 1 trial of SGN-CD70A in patients with CD70-positive diffuse large B cell lymphoma and mantle cell lymphoma
Source: PubMed Central journal article supplement (PMC6440937; doi:10.1007/s10637-018-0655-0), 2018-08-22
Supplement: 10637_2018_655_MOESM2_ESM.pdf [file 10637_2018_655_MOESM2_ESM.pdf]

**Article Title:** A phase 1 trial of SGN-CD70A in patients with CD70-positive Diffuse Large B Cell Lymphoma and Mantle Cell Lymphoma

**Journal Name:** Investigational New Drugs

**Author Names:** Tycel Phillips, Paul M. Barr, Steven I. Park, Kathryn Kolibaba, Paolo F. Caimi, Saurabh Chhabra, Edwin C. Kingsley, Thomas Boyd, Robert Chen, Anne-Sophie Carret, Elaina M. Gartner, Hong Li, Cindy Yu, David C. Smith

**Correspondence:** Tycel Phillips, MD  
 1500 E. Medical Center Dr. SPC 5911, Ann Arbor, MI 48109  
 Phone: (734) 647-8901  
 Fax: (734) 232-1328  
 Email: [tycelp@med.umich.edu](mailto:tycelp@med.umich.edu)

**Online Resource 2:** Treatment-emergent AEs occurring in  $\geq 20\%$  patients in either treatment schedule

| Preferred Term     | q3wk                 |                       |                       |                       | Subtotal<br>(N=12) | q6wk                  |                       | Subtotal<br>(N=8) | Total<br>(N=20) |
|--------------------|----------------------|-----------------------|-----------------------|-----------------------|--------------------|-----------------------|-----------------------|-------------------|-----------------|
|                    | 8<br>mcg/kg<br>(N=3) | 15<br>mcg/kg<br>(N=3) | 30<br>mcg/kg<br>(N=5) | 50<br>mcg/kg<br>(N=1) |                    | 30<br>mcg/kg<br>(N=6) | 50<br>mcg/kg<br>(N=2) |                   |                 |
| Any event, n (%)   | 3 (100)              | 3 (100)               | 5 (100)               | 1 (100)               | 12 (100)           | 6 (100)               | 2 (100)               | 8 (100)           | 20 (100)        |
| Thrombocytopenia   | 1 (33)               | 2 (67)                | 4 (80)                | 1 (100)               | 8 (67)             | 5 (83)                | 2 (100)               | 7 (88)            | 15 (75)         |
| Nausea             | 1 (33)               | 3 (100)               | 2 (40)                | 1 (100)               | 7 (58)             | 4 (67)                | 0                     | 4 (50)            | 11 (55)         |
| Anaemia            | 2 (67)               | 1 (33)                | 2 (40)                | 1 (100)               | 6 (50)             | 4 (67)                | 0                     | 4 (50)            | 10 (50)         |
| Fatigue            | 3 (100)              | 2 (67)                | 3 (60)                | 0                     | 8 (67)             | 1 (17)                | 1 (50)                | 2 (25)            | 10 (50)         |
| Neutropenia        | 1 (33)               | 0                     | 2 (40)                | 1 (100)               | 4 (33)             | 2 (33)                | 1 (50)                | 3 (38)            | 7 (35)          |
| Diarrhoea          | 1 (33)               | 1 (33)                | 1 (20)                | 1 (100)               | 4 (33)             | 1 (17)                | 1 (50)                | 2 (25)            | 6 (30)          |
| Oedema peripheral  | 1 (33)               | 2 (67)                | 1 (20)                | 0                     | 4 (33)             | 2 (33)                | 0                     | 2 (25)            | 6 (30)          |
| Abdominal pain     | 1 (33)               | 1 (33)                | 2 (40)                | 1 (100)               | 5 (42)             | 0                     | 0                     | 0                 | 5 (25)          |
| Constipation       | 1 (33)               | 2 (67)                | 0                     | 1 (100)               | 4 (33)             | 1 (17)                | 0                     | 1 (13)            | 5 (25)          |
| Decreased appetite | 1 (33)               | 0                     | 2 (40)                | 0                     | 3 (25)             | 2 (33)                | 0                     | 2 (25)            | 5 (25)          |
| Dyspnoea           | 0                    | 2 (67)                | 0                     | 1 (100)               | 3 (25)             | 1 (17)                | 1 (50)                | 2 (25)            | 5 (25)          |
| Pyrexia            | 1 (33)               | 0                     | 0                     | 1 (100)               | 2 (17)             | 1 (17)                | 1 (50)                | 2 (25)            | 4 (20)          |

AE, adverse event; q3wk, dose every 3 weeks; q6wk, dose every 6 weeks

Treatment-emergent AEs are defined as newly occurring (not present at baseline) or worsening after first dose of investigational product.
